# Supplementary material for: Long-Term Overexpression of Hsp70 Does Not Protect against Cardiac Dysfunction and Adverse Remodeling in a MURC Transgenic Mouse Model with Chronic Heart Failure and Atrial Fibrillation
Source: PubMed Central journal article supplement (PMC4680216; doi:10.1371/journal.pone.0145173), 2015-12-14
Supplement: pone.0145173.s002.pdf [file pone.0145173.s002.pdf]

**Table S1: TaqMan® Assays.** List of TaqMan® assays used for qPCR analysis.

| <b>Gene Symbol</b> | <b>Gene name</b>                                     | <b>TaqMan® Assay ID</b> |
|--------------------|------------------------------------------------------|-------------------------|
| Atp2a2             | Sarco/endoplasmic reticulum Ca <sup>2+</sup> -ATPase | Mm01201431_m1           |
| Col1a1             | Collagen type 1, alpha 1                             | Mm0801666               |
| Col3a1             | Collagen type 3 alpha 1                              | Mm01254476              |
| Ctgf               | Connective tissue growth factor                      | Mm01192932_g1           |
| Myh6               | $\alpha$ myosin heavy chain                          | Mm00440359              |
| Nppa               | Atrial natriuretic peptide                           | Mm01255747_g1           |
| Nppb               | B type natriuretic peptide                           | Mm01255770_g1           |
